# Supplementary material for: A dual-mode detection strategy for alkaline phosphatase activity based on dimeric G-quadruplex
Source: Royal Society of Chemistry journal article supplement (doi:10.1039/d5ay00934k), 2025-01-01
Supplement: d5ay00934k1.pdf [file d5ay00934k1.pdf]

## Supporting Information

### **Dual-mode detection strategy for alkaline phosphatase activity based on dimeric G-quadruplex**

**Yangfan Chen<sup>a</sup>, Xi Zhou<sup>a</sup>, Hailun He<sup>a</sup>, Changbei Ma<sup>a\*</sup>, Dejian Yuan<sup>b\*</sup>**

<sup>a</sup> School of Life Sciences, Central South University, Changsha 410013, Hunan, China

<sup>b</sup> Department of Medical Genetics, Liuzhou Hospital of Guangzhou Women and Children's Medical Center, Liuzhou, 545616, Guangxi, China

<sup>c</sup> Departments of Medical Genetics, Liuzhou Municipal Maternity and Child Healthcare Hospital, Liuzhou, 545616, Guangxi, China

\* Corresponding author.

\* To whom correspondence should be addressed: E-mail: [macb2012@csu.edu.cn](mailto:macb2012@csu.edu.cn);  
[yuandejian@163.com](mailto:yuandejian@163.com) (D. Yuan).

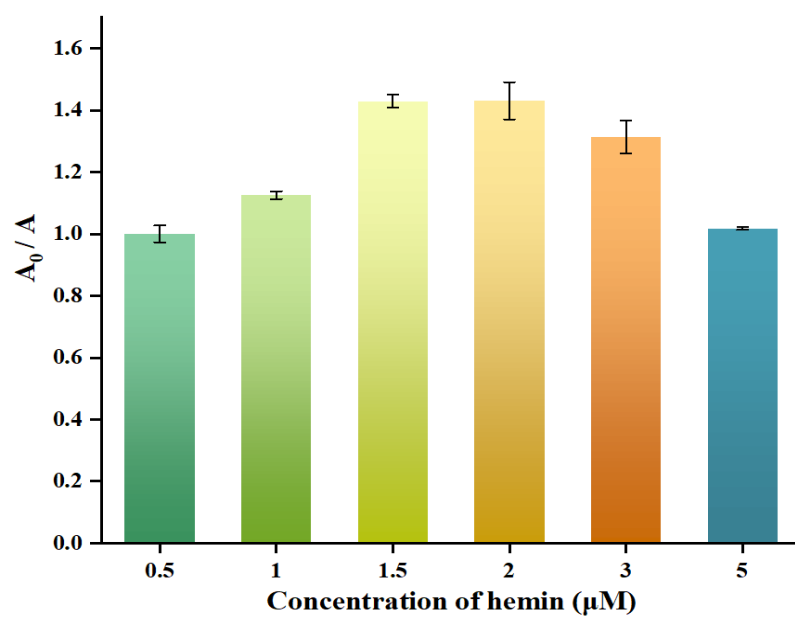

**Figure S1.** Optimisation of the concentration of hemin.  $A_0/A$ : the absorbance ratio without or with the addition of ALP to the reaction system.

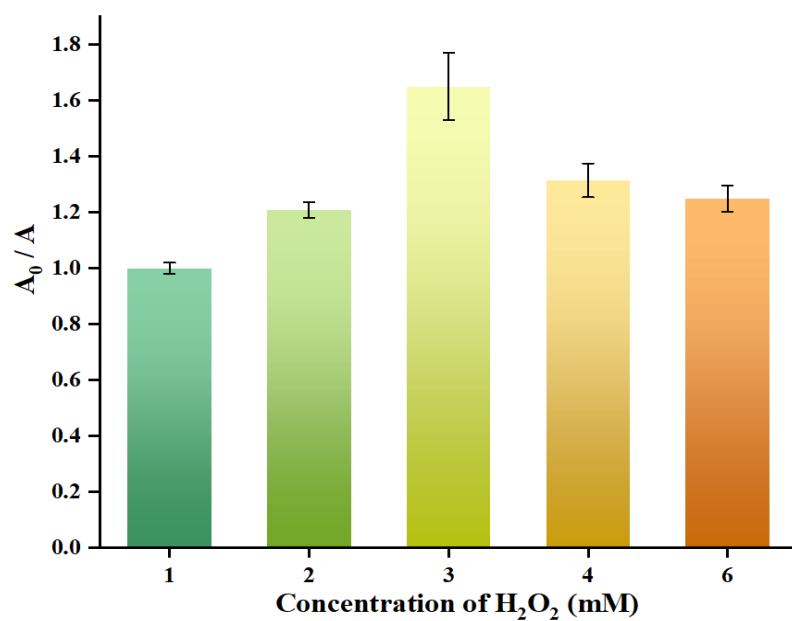

**Figure S2.** Optimisation of the concentration of  $H_2O_2$ .

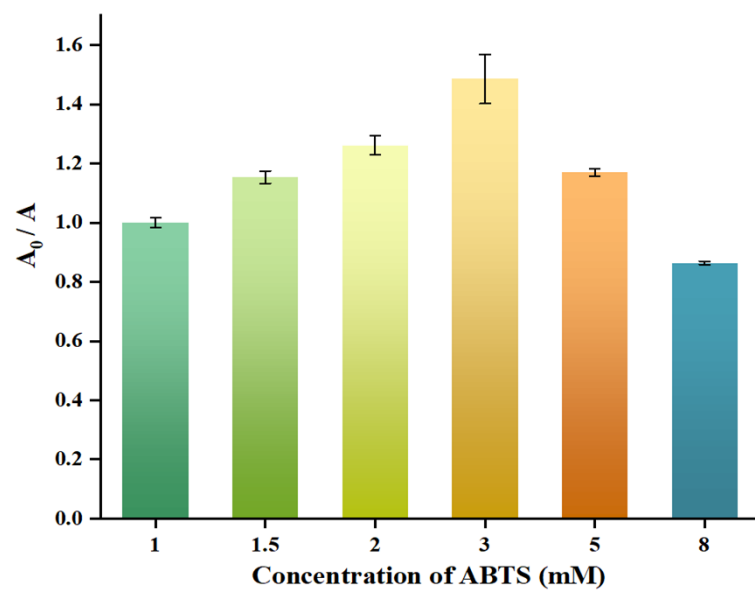

**Figure S3.** Optimisation of the concentration of ABTS.
